# Supplementary material for: Performance of Derived Laboratory Biomarkers with Regard to 30-Day Mortality in Kidney Transplant Recipients with COVID-19
Source: MDPI journal article supplement (doi:10.3390/life12122068), 2022-12-09

## SUPPLEMENTARY FILES

**Supplementary Table S1.** Baseline characteristics of the study sample.

| Variables                                       | Study sample (N=65) |
|-------------------------------------------------|---------------------|
| Age (years)                                     | 57 (45-66)          |
| Female sex                                      | 43 (66.2%)          |
| Transplant duration (years)                     | 8 (2-11)            |
| Any vaccination dose                            | 14 (21.5%)          |
| Symptom duration upon hospital admission (days) | 7 (3-11)            |
| <b>Comorbidities</b>                            |                     |
| Arterial hypertension                           | 53 (81.5%)          |
| Diabetes mellitus                               | 18 (27.7%)          |
| Chronic heart failure                           | 5 (7.7%)            |
| Active smoking                                  | 5 (7.7%)            |
| Atrial fibrillation                             | 7 (10.8%)           |
| Prior AMI                                       | 7 (10.8%)           |
| Prior CVI                                       | 6 (9.2%)            |
| PAD                                             | 10 (15.4%)          |
| COPD/asthma                                     | 4 (6.2%)            |
| <b>Chronic immunosuppressive therapy</b>        |                     |
| Mycophenolate Mofetil                           | 58 (89.2%)          |
| Azathioprine                                    | 1 (1.5%)            |
| Cyclosporine                                    | 20 (30.8%)          |
| Tacrolimus                                      | 36 (55.4%)          |
| Everolimus                                      | 8 (12.3%)           |
| Sirolimus                                       | 3 (4.6%)            |
| Prednisone                                      | 65 (100.0%)         |
| <b>COVID-19 related therapy</b>                 |                     |
| Reconvalescent plasma                           | 6 (9.2%)            |
| Casirivimab/Imdevimab                           | 2 (3.1%)            |
| Remdesivir                                      | 44 (67.7%)          |
| Oxygen therapy                                  | 24 (36.9%)          |

Data are expressed as number (percent) or median (interquartile range).

**Abbreviations:** AMI – acute myocardial infarction; COPD – chronic obstructive pulmonary disease; CVI – cerebrovascular incident; PAD – peripheral arterial disease.

**Supplementary Table S2.** Descriptive statistics of the derived laboratory biomarkers from the study.

| <b>Biomarkers</b>                      | <b>Study sample (N=65)</b> |
|----------------------------------------|----------------------------|
| <b>Neutrophile-to-lymphocyte ratio</b> | 5.55 (4.28-10.85)          |
| <b>Platelet-to-lymphocyte ratio</b>    | 271.00 (183.67-395.35)     |
| <b>Monocyte-to-lymphocyte ratio</b>    | 0.48 (0.37-0.73)           |
| <b>De Ritis ratio</b>                  | 1.31 (1.04-1.69)           |
| <b>CRP-to-albumin ratio</b>            | 2.06 (0.82-2.82)           |
| <b>LDH-to-hemoglobin ratio</b>         | 1.95 (1.53-2.84)           |
| <b>CRP-to-lymphocyte ratio</b>         | 56.80 (22.19-124.53)       |
| <b>RDW-to-albumin ratio</b>            | 0.41 (0.38-0.44)           |
| <b>Platelet-to-albumin ratio</b>       | 5.63 (4.69-7.05)           |
| <b>D-Dimer-to-albumin ratio</b>        | 0.02 (0.02-0.04)           |
| <b>D-Dimer-to-NLR ratio</b>            | 0.15 (0.09-0.23)           |
| <b>LDH-to-albumin ratio</b>            | 7.36 (5.82-10.86)          |
| <b>LDH-to-WBC ratio</b>                | 41.03 (30.18-53.73)        |

Data are expressed as median (interquartile range).

**Abbreviations:** CRP – C-reactive protein; DD – D-dimers; Hgb – hemoglobin; HR – hazard ratios; LDH – lactate dehydrogenase; MLR – monocyte-to-lymphocyte ratio; NLR – neutrophile-to-lymphocyte ratio; Plt – platelets; PLR – platelet-to-lymphocyte ratio; RDW – red cell distribution width; WBC – white blood cells.

**Supplementary Table S3.** Comparison of ROC curves between the derived laboratory biomarkers from the study.

| Variables                       | Neutrophile-to-lymphocyte ratio | Platelet-to-lymphocyte ratio | Monocyte-to-lymphocyte ratio | De Ritis ratio   | CRP-to-albumin ratio | LDH-to-hemoglobin ratio | CRP-to-lymphocyte ratio | RDW-to-albumin ratio | Platelet-to-albumin ratio | D-Dimer-to-albumin ratio | D-Dimer-to-NLR ratio | LDH-to-albumin ratio | LDH-to-WBC ratio |
|---------------------------------|---------------------------------|------------------------------|------------------------------|------------------|----------------------|-------------------------|-------------------------|----------------------|---------------------------|--------------------------|----------------------|----------------------|------------------|
| Neutrophile-to-lymphocyte ratio |                                 | 0.065<br>p=0.342             | 0.020<br>p=0.845             | 0.097<br>p=0.325 | 0.170<br>p=0.095     | 0.283<br>p<0.001        | 0.145<br>p=0.088        | 0.008<br>p=0.944     | 0.038<br>p=0.767          | 0.009<br>p=0.941         | 0.091<br>p=0.343     | 0.233<br>p=0.006     | 0.082<br>p=0.494 |
| Platelet-to-lymphocyte ratio    |                                 |                              | 0.044<br>p=0.713             | 0.161<br>p=0.155 | 0.234<br>p=0.047     | 0.347<br>p<0.001        | 0.209<br>p=0.012        | 0.057<br>p=0.667     | 0.027<br>p=0.831          | 0.056<br>p=0.650         | 0.027<br>p=0.827     | 0.297<br>p=0.005     | 0.146<br>p=0.189 |
| Monocyte-to-lymphocyte ratio    |                                 |                              |                              | 0.117<br>p=0.256 | 0.190<br>p=0.128     | 0.303<br>p=0.008        | 0.165<br>p=0.213        | 0.013<br>p=0.924     | 0.017<br>p=0.899          | 0.012<br>p=0.923         | 0.071<br>p=0.521     | 0.253<br>p=0.027     | 0.102<br>p=0.455 |
| De Ritis ratio                  |                                 |                              |                              |                  | 0.073<br>p=0.459     | 0.186<br>p=0.021        | 0.048<br>p=0.660        | 0.105<br>p=0.357     | 0.134<br>p=0.251          | 0.105<br>p=0.351         | 0.188<br>p=0.131     | 0.136<br>p=0.114     | 0.015<br>p=0.899 |
| CRP-to-albumin ratio            |                                 |                              |                              |                  |                      | 0.113<br>p=0.082        | 0.025<br>p=0.710        | 0.178<br>p=0.096     | 0.208<br>p=0.052          | 0.178<br>p=0.091         | 0.261<br>p=0.021     | 0.063<br>p=0.355     | 0.088<br>p=0.389 |
| LDH-to-hemoglobin ratio         |                                 |                              |                              |                  |                      |                         | 0.138<br>p=0.064        | 0.291<br>p=0.001     | 0.321<br>p=0.001          | 0.292<br>p<0.001         | 0.374<br>p<0.001     | 0.050<br>p=0.080     | 0.201<br>p=0.014 |
| CRP-to-lymphocyte ratio         |                                 |                              |                              |                  |                      |                         |                         | 0.153<br>p=0.188     | 0.182<br>p=0.111          | 0.153<br>p=0.166         | 0.236<br>p=0.061     | 0.088<br>p=0.266     | 0.063<br>p=0.476 |
| RDW-to-albumin ratio            |                                 |                              |                              |                  |                      |                         |                         |                      | 0.030<br>p=0.766          | 0.001<br>p=0.994         | 0.083<br>p=0.523     | 0.241<br>p=0.002     | 0.090<br>p=0.481 |
| Platelet-to-albumin ratio       |                                 |                              |                              |                  |                      |                         |                         |                      |                           | 0.029<br>p=0.778         | 0.054<br>p=0.649     | 0.270<br>p=0.004     | 0.119<br>p=0.261 |
| D-Dimer-to-albumin ratio        |                                 |                              |                              |                  |                      |                         |                         |                      |                           |                          | 0.083<br>p=0.357     | 0.241<br>p=0.003     | 0.090<br>p=0.463 |
| D-Dimer-to-NLR ratio            |                                 |                              |                              |                  |                      |                         |                         |                      |                           |                          |                      | 0.324<br>p=0.003     | 0.173<br>p=0.216 |
| LDH-to-albumin ratio            |                                 |                              |                              |                  |                      |                         |                         |                      |                           |                          |                      |                      | 0.151<br>p=0.095 |
| LDH-to-WBC ratio                |                                 |                              |                              |                  |                      |                         |                         |                      |                           |                          |                      |                      |                  |

\*Data are presented as the difference between areas - method by *Hanley & McNeil* (1983).

**Abbreviations:** CRP – C-reactive protein; CI – confidence intervals; DD – D-dimers; Hgb – hemoglobin; HR – hazard ratios; LDH – lactate dehydrogenase; MLR – monocyte-to-lymphocyte ratio; NLR – neutrophile-to-lymphocyte ratio; Plt – platelets; PLR – platelet-to-lymphocyte ratio; RDW – red cell distribution width; WBC – white blood cells.

**Supplementary Figure S1.** Flow diagram.

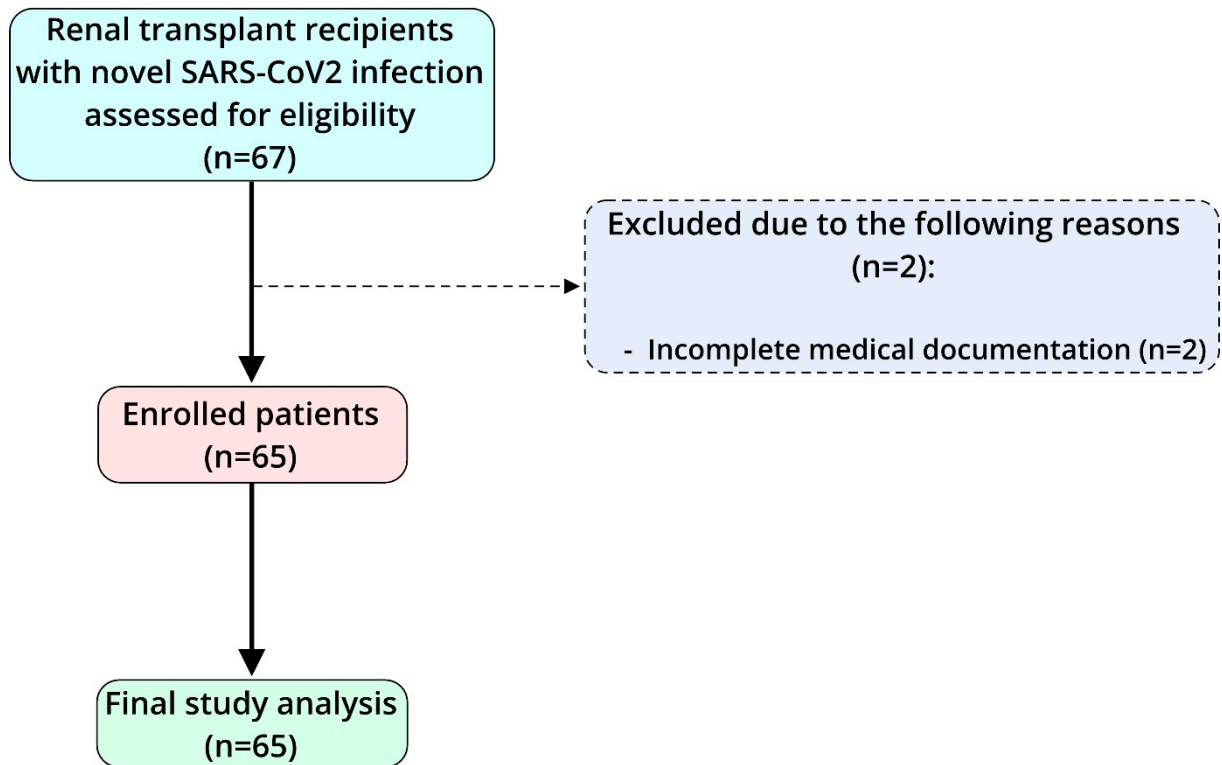

Supplement: s1 [file s1]
